# Supplementary material for: Triazole-derivatized ligand-directed diverse structures and polyaniline-assisted capacitive performances of two new Anderson-type [AlMo6(OH)6O18]3−-based metal–organic complexes
Source: Royal Society of Chemistry journal article supplement (doi:10.1039/d5ce00049a), 2025-01-01
Supplement: d5ce00049a1.pdf [file d5ce00049a1.pdf]

## Supporting Information

### **Triazole-derivatived ligands-directed diverse structures and polyaniline-assisted capacitive performances of two new Anderson-type $[\text{AlMo}_6(\text{OH})_6\text{O}_{18}]^{3-}$ -based metal-organic complexes**

Zhi-fei Zu,<sup>#</sup>Ju-ju Liang,<sup>#</sup>Zhi-han Chang\*, Yu-chun Lin and Xiu-li Wang\*

*College of Chemistry and Materials Engineering, Bohai University, Liaoning Professional Technology Innovation Center of Liaoning Province for Conversion Materials of Solar Cell, Jinzhou 121013, P. R. China*

\*Corresponding authors, E-mail addresses: [wangxiuli@bhu.edu.cn](mailto:wangxiuli@bhu.edu.cn) (Xiu-li Wang) [changzhihan@bhu.edu.cn](mailto:changzhihan@bhu.edu.cn) (Zhi-han Chang)

### **Materials and General Methods**

The FT-IR spectra were taken on a Varian FT-IR 640 spectrometer (KBr pellets) in the range of 500-4000  $\text{cm}^{-1}$ . Powder X-ray diffraction (PXRD) patterns were collected using a D/teX Ultra diffractometer with Cu K $\alpha$  radiation ( $\lambda = 1.5418 \text{ \AA}$ ). Crystal data of complexes **1** and **2** were collected using a Bruker SMART APEXII with Mo K $\alpha$  radiation ( $\lambda = 0.71073 \text{ \AA}$ ) system. The structures of **1** and **2** were solved by the direct method and refined by full matrix least squares on  $F^2$  using the Olex2 software. A CHI-760 electrochemical workstation was used to measure electrochemical capacitive and collect data. The classical three-electrode system was adopted, in which the Ag/AgCl electrode was used as reference electrode and the Pt wire as the counter electrode.

### **Preparation of carbon paper-based electrodes modified by**

## complexes 1-2

The mixture of 5 mg crystal and 25 mg activated carbon was fully ground in a mortar for one hour, and then dispersed into a solution of 300  $\mu\text{L}$  water and 100  $\mu\text{L}$  ethanol, and sonicated for one hour to form a uniform turbid liquid. A well-dispersed slurry droplet of 10  $\mu\text{L}$  was dispersed on a carbon paper electrode (0.5cm $\times$ 0.5cm) and dried at room temperature for two hours. Finally, 5  $\mu\text{L}$  of Nafion solution was dropped on the electrode surface and dried at room temperature.

Table.S1 Partial bond lengths and bond angles of complex **1**

| <b>1</b>    |            |             |            |
|-------------|------------|-------------|------------|
| Zn1-N1      | 2.196(3)   | N2-Zn1-N1   | 77.28(11)  |
| Zn1-N2      | 2.185(3)   | O2-WZn1-N2  | 95.80(11)  |
| Zn1-O1W     | 2.064(3)   | O2W-Zn1-N1  | 89.76(12)  |
| Zn1-O4W     | 2.115(3)   | O2W-Zn1-O4W | 175.20(13) |
| Zn1-O3W     | 2.058(3)   | O1W-Zn1-N2  | 164.81(11) |
| Zn1-O2W     | 2.088(3)   | O1W-Zn1-O2W | 90.27(14)  |
| O3W-Zn1-N2  | 99.13(11)  | O1W-Zn1-N1  | 88.87(12)  |
| O3W-Zn1-O2W | 87.16(12)  | O1W-Zn1-O4W | 89.86(15)  |
| O3W-Zn1-N1  | 175.02(12) | O4W-Zn1-N2  | 85.25(12)  |
| O3W-Zn1-O1W | 95.05(12)  | O4W-Zn1-N1  | 95.04(12)  |
| O3W-Zn1-O4W | 88.05(13)  |             |            |

Symmetrycodes: <sup>1</sup>1-X,+Y,1/2-Z

Table.S2 Partial bond lengths and bond angles of complex **2**

| <b>2</b>   |            |             |            |
|------------|------------|-------------|------------|
| Zn1-O1     | 2.131(2)   | O2W-Zn1-O1W | 88.06(15)  |
| Zn1-O3W    | 2.131(2)   | O2W-Zn1-N2  | 170.43(11) |
| Zn1-O2W    | 2.064(3)   | O2W-Zn1-N1  | 94.47(11)  |
| Zn1-O1W    | 2.106(3)   | O1W-Zn1-O1  | 88.20(12)  |
| Zn1-N2     | 2.127(3)   | O1W-Zn1-O3W | 170.25(14) |
| Zn1-N1     | 2.137(3)   | O1W-Zn1-N2  | 97.73(15)  |
| O1-Zn1-O3W | 86.01(9)   | O1W-Zn1-N1  | 92.24(13)  |
| O1-Zn1-N1  | 174.61(10) | N2-Zn1-O1   | 96.85(10)  |

|             |           |            |           |
|-------------|-----------|------------|-----------|
| O3W-Zn1-N1  | 94.26(10) | N2-Zn1-O3W | 90.75(11) |
| O2W-Zn1-O1  | 90.91(11) | N2-Zn1-N1  | 77.77(10) |
| O2W-Zn1-O3W | 84.20(11) |            |           |

Symmetrycodes:<sup>1</sup>2-X,1-Y,1-Z

Table.S3 The weak hydrogen bonding interactions of complex **1**

| D - H...A          | H...A | D...A    | D - H...A |
|--------------------|-------|----------|-----------|
| O(2W)-H(2WA)...O5  | 1.91  | 2.751(4) | 169       |
| O(4W)-H(4WB)...O10 | 1.84  | 2.685(4) | 166       |

Table.S4 Hydrogen bonding interaction of complex **2**

| D - H...A          | H...A | D...A    | D - H...A |
|--------------------|-------|----------|-----------|
| O(3W)-H(3WB)...O11 | 1.89  | 2.730(5) | 168       |
| O(2W)-H(2WB)...O2  | 1.97  | 2.809(4) | 166       |

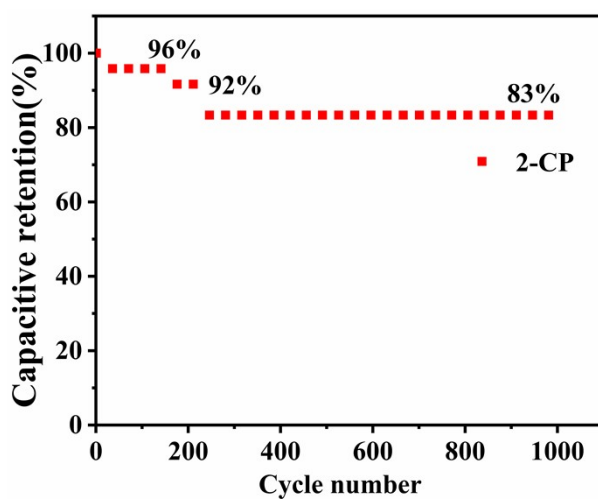

**Fig. S1** The stability of capacitance following 1000 cycles at a current density of 20  $A \cdot g^{-1}$

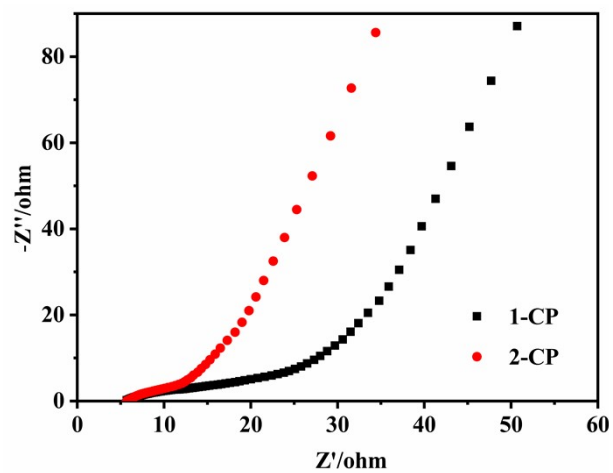

**Fig. S2** Nyquist plots of complexes 1-2

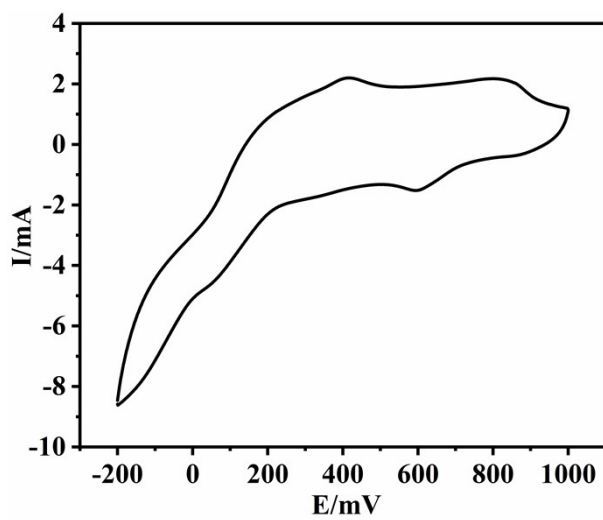

**Fig. S3** The CV curves of electrochemical conditioning of PANI-1@1-CP.

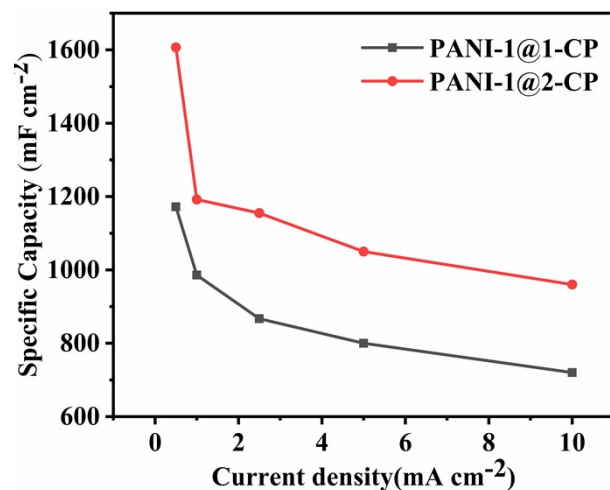

**Fig. S4** The trend of areal specific capacity with current density of PANI-1@1-CP and PANI-1@2-CP at the current densities of 0.5, 1, 2.5, 5 and 10 mA cm<sup>-2</sup>.

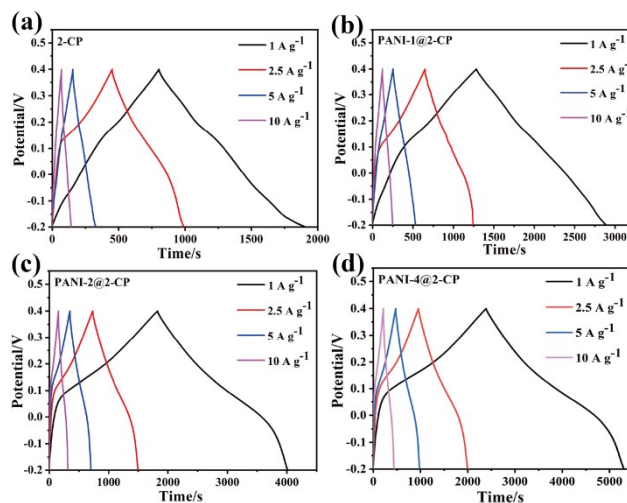

**Fig. S5** The GCD curves of 2-CP(a), PANI-1@2-CP(b), PANI-2@2-CP(c), PANI-4@2-CP(d) at the current densities of 1, 2.5, 5, 10 A g<sup>-1</sup>.
